# Supplementary material for: Sex differences in utilisation of hospital care in a state-sponsored health insurance programme providing access to free services in South India
Source: PubMed Central journal article supplement — BMJ Glob Health. 2018 Jun 29;3(3):e000859. doi: 10.1136/bmjgh-2018-000859 (PMC6035505; doi:10.1136/bmjgh-2018-000859), 2018-06-29
Supplement: bmjgh-2018-000859supp001.pdf [file bmjgh-2018-000859supp001.pdf]

## Supplementary material

**WEBSITE 1: Number of procedures and billing codes per ICD-10 category covered by the Rajiv Aarogyasri Community Health Insurance Scheme**

| <b>ICD-10 Category</b>                                                                                        | <b>Number of Unique Procedures Covered</b> | <b>Number of Billing Codes included</b> |
|---------------------------------------------------------------------------------------------------------------|--------------------------------------------|-----------------------------------------|
| (P00-P96) Certain conditions originating in the perinatal period                                              | 1                                          | 18                                      |
| (A00-B99) Certain infectious and parasitic diseases                                                           | 12                                         | 16                                      |
| (Q00-Q99) Congenital malformations, deformations and chromosomal abnormalities                                | 81                                         | 108                                     |
| (D50-D89) Diseases of the blood and blood-forming organs and certain disorders involving the immune mechanism | 7                                          | 7                                       |
| (I00-I99) Diseases of the circulatory system                                                                  | 50                                         | 67                                      |
| (K00-K93) Diseases of the digestive system                                                                    | 107                                        | 125                                     |
| (H60-H95) Diseases of the ear and mastoid process                                                             | 11                                         | 11                                      |
| (H00-H59) Diseases of the eye and adnexa                                                                      | 20                                         | 26                                      |
| (N00-N99) Diseases of the genitourinary system                                                                | 65                                         | 80                                      |
| (M00-M99) Diseases of the musculoskeletal system and connective tissue                                        | 27                                         | 34                                      |
| (G00-G99) Diseases of the nervous system                                                                      | 45                                         | 48                                      |
| (J00-J99) Diseases of the respiratory system                                                                  | 24                                         | 36                                      |
| (L00-L99) Diseases of the skin and subcutaneous tissue                                                        | 5                                          | 5                                       |
| (E00-E90) Endocrine, nutritional and metabolic diseases                                                       | 17                                         | 17                                      |
| (Z00-Z99) Factors influencing health status and contact with health services                                  | 2                                          | 4                                       |
| (S00-T98) Injury, poisoning and certain other consequences of external causes                                 | 36                                         | 63                                      |
| (C00-D48) Neoplasms                                                                                           | 157                                        | 234                                     |
| (O00-O99) Pregnancy, childbirth and the puerperium                                                            | 4                                          | 4                                       |
| (R00-R99) Symptoms, signs and abnormal clinical and laboratory findings, not elsewhere classified             | 4                                          | 4                                       |

**WEBTABLE 2. - Age and Sex distribution of Population in Andhra Pradesh¶**

| Age Group | Age group as Proportion of<br>State's Population<br>% | Sex Ratio<br>(Per 1000 men) | Percentage<br>Women<br>% |
|-----------|-------------------------------------------------------|-----------------------------|--------------------------|
| 0-14      | 25.8                                                  | 944.7                       | 48.60                    |
| 15-24     | 19.2                                                  | 966.3                       | 49.14                    |
| 24-34     | 17.0                                                  | 1022.9                      | 50.57                    |
| 35-44     | 14.1                                                  | 986.8                       | 49.67                    |
| 45-54     | 9.8                                                   | 962.3                       | 49.04                    |
| 55-64     | 7.2                                                   | 1154.0                      | 53.58                    |
| ≥65       | 6.0                                                   | 1098.0                      | 52.34                    |
| Age N.A.  | 0.9                                                   | 989.0                       | 49.74                    |
| All ages  | 100.0                                                 | 992.0                       | 49.82                    |

¶Based on data from India Census 2011

**WEBTABLE 3: Leading causes of utilization of hospital services and resources by women, including sex-specific conditions**

| <b>Disease Category</b>          | <b>Individuals, n (%)</b> | <b>Hospitalizations, n (%)</b> | <b>Hospital expenditure, million USD (%)</b> | <b>Bed-Days, n (%)</b> | <b>Operative Hospitalizations, n (%)</b> |
|----------------------------------|---------------------------|--------------------------------|----------------------------------------------|------------------------|------------------------------------------|
| Neoplasms                        | 66931 (15.9)              | 223941 (38)                    | 48.87 (19.6)                                 | 1389403 (38.3)         | 26169 (8.9)                              |
| Genitourinary system             | 74090 (17.6)              | 76676 (13)                     | 34.65 (13.9)                                 | 394788 (10.9)          | 46716 (15.8)                             |
| Injury, poisoning                | 58895 (14)                | 60543 (10.3)                   | 25.15 (10.1)                                 | 489113 (13.5)          | 59511 (20.2)                             |
| Digestive system                 | 49433 (11.7)              | 50375 (8.5)                    | 23.65 (9.5)                                  | 348464 (9.6)           | 48586 (16.5)                             |
| Circulatory system               | 43311 (10.3)              | 46070 (7.8)                    | 48.79 (19.6)                                 | 230388 (6.4)           | 18410 (6.2)                              |
| Musculoskeletal system           | 28453 (6.8)               | 29053 (4.9)                    | 17.52 (7)                                    | 224889 (6.2)           | 28190 (9.6)                              |
| Ear and mastoid process          | 19785 (4.7)               | 20422 (3.5)                    | 5.64 (2.3)                                   | 73172 (2)              | 20422 (6.9)                              |
| Endocrine & metabolic            | 18672 (4.4)               | 18736 (3.2)                    | 6.71 (2.7)                                   | 111306 (3.1)           | 18476 (6.3)                              |
| Congenital malformations         | 16512 (3.9)               | 17356 (2.9)                    | 17.29 (6.9)                                  | 121406 (3.3)           | 16509 (5.6)                              |
| Nervous system                   | 16486 (3.9)               | 16799 (2.8)                    | 7.48 (3)                                     | 101641 (2.8)           | 3664 (1.2)                               |
| Respiratory system               | 7579 (1.8)                | 7956 (1.3)                     | 3.65 (1.5)                                   | 44630 (1.2)            | 912 (0.3)                                |
| Perinatal period                 | 6878 (1.6)                | 6896 (1.2)                     | 3.32 (1.3)                                   | 49010 (1.4)            | -                                        |
| Eye and adnexa                   | 5128 (1.2)                | 6169 (1)                       | 1.64 (0.7)                                   | 12137 (0.3)            | 6169 (2.1)                               |
| Infectious and parasitic         | 5887 (1.4)                | 6033 (1)                       | 1.31 (0.5)                                   | 21007 (0.6)            | 164 (0.1)                                |
| Blood-forming organs             | 1278 (0.3)                | 1327 (0.2)                     | 0.29 (0.1)                                   | 4910 (0.1)             | -                                        |
| Pregnancy, childbirth            | 504 (0.1)                 | 504 (0.1)                      | 0.2 (0.1)                                    | 5261 (0.1)             | 504 (0.2)                                |
| Skin and subcutaneous tissue     | 442 (0.1)                 | 474 (0.1)                      | 0.15 (0.1)                                   | 3171 (0.1)             | -                                        |
| Other Factors influencing health | 362 (0.1)                 | 365 (0.1)                      | 3.03 (1.2)                                   | 1470 (0)               | 348 (0.1)                                |
| Unclassified Symptoms & Signs    | 358 (0.1)                 | 358 (0.1)                      | 0.22 (0.1)                                   | 1735 (0)               | -                                        |
| <b>Total</b>                     | <b>420984 (100)</b>       | <b>590053 (100)</b>            | <b>249.46 (100)</b>                          | <b>3627901 (100)</b>   | <b>294750 (100)</b>                      |

**WEBTABLE 4: Leading causes of utilization of hospital services and resources by men, including sex-specific conditions**

| <b>Disease Category</b>          | <b>Individuals, n (%)</b> | <b>Hospitalizations, n (%)</b> | <b>Hospital expenditure, million USD (%)</b> | <b>Bed-Days, n (%)</b> | <b>Operative Hospitalizations, n (%)</b> |
|----------------------------------|---------------------------|--------------------------------|----------------------------------------------|------------------------|------------------------------------------|
| Injury, poisoning                | 122968 (21.8)             | 127603 (20.1)                  | 53.97 (15.7)                                 | 1047836 (25.2)         | 125956 (33.1)                            |
| Circulatory system               | 90805 (16.1)              | 99873 (15.8)                   | 100.57 (29.2)                                | 466910 (11.2)          | 34337 (9)                                |
| Genitourinary system             | 90739 (16.1)              | 97251 (15.3)                   | 44.05 (12.8)                                 | 416032 (10)            | 35600 (9.4)                              |
| Neoplasms                        | 37142 (6.6)               | 77758 (12.3)                   | 26.18 (7.6)                                  | 726544 (17.5)          | 16928 (4.4)                              |
| Digestive system                 | 65808 (11.7)              | 67643 (10.7)                   | 32.16 (9.3)                                  | 491722 (11.8)          | 61975 (16.3)                             |
| Musculoskeletal system           | 40959 (7.3)               | 41848 (6.6)                    | 25.55 (7.4)                                  | 323513 (7.8)           | 41778 (11)                               |
| Nervous system                   | 28077 (5)                 | 28701 (4.5)                    | 12.04 (3.5)                                  | 168190 (4.1)           | 6161 (1.6)                               |
| Congenital malformations         | 25136 (4.5)               | 27505 (4.3)                    | 22.94 (6.7)                                  | 208055 (5)             | 26482 (7)                                |
| Ear and mastoid process          | 16944 (3)                 | 17453 (2.8)                    | 4.71 (1.4)                                   | 62450 (1.5)            | 17453 (4.6)                              |
| Respiratory system               | 14041 (2.5)               | 14814 (2.3)                    | 6.89 (2)                                     | 88681 (2.1)            | 1692 (0.4)                               |
| Perinatal period                 | 10442 (1.9)               | 10464 (1.7)                    | 5.03 (1.5)                                   | 74291 (1.8)            | -                                        |
| Eye and adnexa                   | 7393 (1.3)                | 9389 (1.5)                     | 2.7 (0.8)                                    | 20618 (0.5)            | 9389 (2.5)                               |
| Infectious and parasitic         | 7923 (1.4)                | 8103 (1.3)                     | 1.85 (0.5)                                   | 29762 (0.7)            | 405 (0.1)                                |
| Endocrine & metabolic            | 2313 (0.4)                | 2333 (0.4)                     | 0.91 (0.3)                                   | 14683 (0.4)            | 2082 (0.5)                               |
| Blood-forming organs             | 1381 (0.2)                | 1530 (0.2)                     | 0.4 (0.1)                                    | 5222 (0.1)             | -                                        |
| Unclassified Symptoms & signs    | 555 (0.1)                 | 558 (0.1)                      | 0.33 (0.1)                                   | 2120 (0.1)             | -                                        |
| Other Factors influencing health | 542 (0.1)                 | 543 (0.1)                      | 4.13 (1.2)                                   | 2189 (0.1)             | 475 (0.1)                                |
| Skin and subcutaneous tissue     | 275 (0)                   | 301 (0)                        | 0.11 (0)                                     | 2234 (0.1)             | -                                        |
| <b>Total</b>                     | <b>563443 (100)</b>       | <b>633670 (100)</b>            | <b>344.41 (100)</b>                          | <b>4151052 (100)</b>   | <b>380713 (100)</b>                      |

**WEBSITE 5: Number of unique individuals utilizing hospital care for sex-neutral conditions, by sex and disease category**

| ICD 10 Disease Category                  | Individuals seeking treatment, n (%) |                     |                  |
|------------------------------------------|--------------------------------------|---------------------|------------------|
|                                          | Women                                | Men                 | Percentage women |
| Injuries                                 | 58895 (16.2)                         | 122968 (22.9)       | 32.4             |
| Circulatory system                       | 43311 (11.9)                         | 90805 (16.9)        | 32.3             |
| Digestive system                         | 49293 (13.6)                         | 65808 (12.2)        | 42.8             |
| Genitourinary system                     | 31696 (8.7)                          | 72376 (13.5)        | 30.5             |
| Neoplasms                                | 51648 (14.2)                         | 35961 (6.7)         | 59.2             |
| Musculoskeletal system                   | 28453 (7.8)                          | 40959 (7.6)         | 41.0             |
| Nervous system                           | 16486 (4.5)                          | 28077 (5.2)         | 37.0             |
| Ear and mastoid process                  | 19785 (5.5)                          | 16944 (3.2)         | 53.9             |
| Congenital malformations                 | 16512 (4.6)                          | 18455 (3.4)         | 47.2             |
| Respiratory system                       | 7579 (2.1)                           | 14041 (2.6)         | 35.1             |
| Endocrine, nutritional, metabolic        | 18672 (5.1)                          | 2313 (0.4)          | 89.0             |
| Perinatal period                         | 6878 (1.9)                           | 10442 (1.9)         | 39.7             |
| Infectious and parasitic                 | 5887 (1.6)                           | 7923 (1.5)          | 42.6             |
| Eye and adnexa                           | 5128 (1.4)                           | 7393 (1.4)          | 41.0             |
| Blood-forming organs                     | 1278 (0.4)                           | 1381 (0.3)          | 48.1             |
| Symptoms, signs not elsewhere classified | 358 (0.1)                            | 555 (0.1)           | 39.2             |
| Factors influencing health status        | 362 (0.1)                            | 542 (0.1)           | 40.0             |
| Skin and subcutaneous tissue             | 442 (0.1)                            | 275 (0.1)           | 61.6             |
| <b>All individuals</b>                   | <b>362663 (100)</b>                  | <b>537218 (100)</b> | <b>40.3</b>      |

**WEBTABLE 6: Hospitalization events by disease category for sex-neutral conditions**

| ICD 10 Disease Category                  | Hospitalizations, n (%) |                     |                  |
|------------------------------------------|-------------------------|---------------------|------------------|
|                                          | Women                   | Men                 | Percentage women |
| Injury, poisoning                        | 60543 (14.1)            | 127603 (21.2)       | 32.2             |
| Circulatory system                       | 46070 (10.7)            | 99873 (16.6)        | 31.6             |
| Digestive system                         | 50233 (11.7)            | 67643 (11.2)        | 42.6             |
| Genitourinary system                     | 34056 (7.9)             | 78347 (13.0)        | 30.3             |
| Neoplasms                                | 109449 (25.4)           | 74825 (12.4)        | 59.4             |
| Musculoskeletal system                   | 29053 (6.8)             | 41848 (7)           | 41.0             |
| Nervous system                           | 16799 (3.9)             | 28701 (4.8)         | 36.9             |
| Ear and mastoid process                  | 20422 (4.8)             | 17453 (2.9)         | 53.9             |
| Congenital malformations                 | 17356 (4.1)             | 19636 (3.3)         | 46.9             |
| Respiratory system                       | 7956 (1.9)              | 14814 (2.5)         | 34.9             |
| Endocrine, nutritional, metabolic        | 18736 (4.4)             | 2333 (0.4)          | 88.9             |
| Perinatal period                         | 6896 (1.6)              | 10464 (1.8)         | 39.7             |
| Infectious and parasitic                 | 6033 (1.4)              | 8103 (1.4)          | 42.7             |
| Eye and adnexa                           | 6169 (1.5)              | 9389 (1.6)          | 39.7             |
| Blood-forming organs                     | 1327 (0.4)              | 1530 (0.3)          | 46.4             |
| Symptoms, signs not elsewhere classified | 358 (0.1)               | 558 (0.1)           | 39.1             |
| Factors influencing health status        | 365 (0.1)               | 543 (0.1)           | 40.2             |
| Skin and subcutaneous tissue             | 474 (0.2)               | 301 (0.1)           | 61.2             |
| <b>All Admissions</b>                    | <b>432295 (100)</b>     | <b>603964 (100)</b> | <b>41.7</b>      |

**WEBTABLE 7: Hospital expenditure on hospital claims for sex-neutral conditions, by sex and disease category**

| ICD 10 Disease Category                  | Hospital expenditure, million USD (%) |                    |                  |
|------------------------------------------|---------------------------------------|--------------------|------------------|
|                                          | Women                                 | Men                | Percentage women |
| Injury, poisoning                        | 25.2 (11.8)                           | 54 (16.4)          | 31.8             |
| Circulatory system                       | 48.8 (22.9)                           | 100.6 (30.6)       | 32.7             |
| Digestive system                         | 23.6 (11.1)                           | 32.2 (9.8)         | 42.3             |
| Genitourinary system                     | 14.9 (7)                              | 34.3 (10.4)        | 30.3             |
| Neoplasms                                | 33 (15.5)                             | 25.5 (7.8)         | 56.5             |
| Musculoskeletal system                   | 17.6 (8.3)                            | 25.6 (7.8)         | 40.7             |
| Nervous system                           | 7.5 (3.5)                             | 12.1 (3.7)         | 38.3             |
| Ear and mastoid process                  | 5.7 (2.7)                             | 4.8 (1.5)          | 54.5             |
| Congenital malformations                 | 17.3 (8.1)                            | 18.7 (5.7)         | 48.1             |
| Respiratory system                       | 3.7 (1.8)                             | 6.9 (2.1)          | 34.6             |
| Endocrine, nutritional, metabolic        | 6.8 (3.2)                             | 1 (0.3)            | 88.1             |
| Perinatal period                         | 3.4 (1.6)                             | 5.1 (1.6)          | 39.7             |
| Infectious and parasitic                 | 1.4 (0.7)                             | 1.9 (0.6)          | 41.3             |
| Eye and adnexa                           | 1.7 (0.8)                             | 2.7 (0.9)          | 37.8             |
| Blood-forming organs                     | 0.3 (0.2)                             | 0.4 (0.2)          | 41.7             |
| Symptoms, signs not elsewhere classified | 0.3 (0.2)                             | 0.4 (0.1)          | 39.9             |
| Factors influencing health status        | 3.1 (1.5)                             | 4.2 (1.3)          | 42.3             |
| Skin and subcutaneous tissue             | 0.2 (0.1)                             | 0.2 (0.1)          | 59.6             |
| <b>All hospital expenditure</b>          | <b>213.6 (100)</b>                    | <b>329.6 (100)</b> | <b>39.3</b>      |



**WEBTABLE 8: Number of bed-days for sex-neutral conditions, by sex and disease category**

| ICD 10 Disease Category                  | Number of bed-days, n (%) |                        |                  |
|------------------------------------------|---------------------------|------------------------|------------------|
|                                          | Women                     | Men                    | Percentage women |
| Injury, poisoning                        | 489113 (15.4)             | 1047836 (26.4)         | 31.8             |
| Circulatory system                       | 230388 (7.3)              | 466910 (11.8)          | 33.0             |
| Digestive system                         | 347479 (10.9)             | 491722 (12.4)          | 41.4             |
| Genitourinary system                     | 138913 (4.4)              | 316434 (8)             | 30.5             |
| Neoplasms                                | 1212898 (38.1)            | 708984 (17.9)          | 63.1             |
| Musculoskeletal system                   | 224889 (7.1)              | 323513 (8.2)           | 41.0             |
| Nervous system                           | 101641 (3.2)              | 168190 (4.3)           | 37.7             |
| Ear and mastoid process                  | 73172 (2.3)               | 62450 (1.6)            | 54.0             |
| Congenital malformations                 | 121406 (3.9)              | 149559 (3.8)           | 44.8             |
| Respiratory system                       | 44630 (1.4)               | 88681 (2.3)            | 33.5             |
| Endocrine, nutritional, metabolic        | 111306 (3.5)              | 14683 (0.4)            | 88.3             |
| Perinatal period                         | 49010 (1.6)               | 74291 (1.9)            | 39.7             |
| Infectious and parasitic                 | 21007 (0.7)               | 29762 (0.8)            | 41.4             |
| Eye and adnexa                           | 12137 (0.4)               | 20618 (0.6)            | 37.1             |
| Blood-forming organs                     | 4910 (0.2)                | 5222 (0.2)             | 48.5             |
| Symptoms, signs not elsewhere classified | 1735 (0.1)                | 2120 (0.1)             | 45.0             |
| Factors influencing health status        | 1470 (0.1)                | 2189 (0.1)             | 40.2             |
| Skin and subcutaneous tissue             | 3171 (0.1)                | 2234 (0.1)             | 58.7             |
| <b>All bed-days</b>                      | <b>3189275 (100)</b>      | <b>3975398 (100.1)</b> | <b>44.5</b>      |
